# Supplementary material for: Apoptotic Cell Clearance Triggers Epithelial Fate Reprogramming During Prostate Regression
Source: Research Square preprint supplement (doi:10.21203/rs.3.rs-7420086/v1), 2025-10-01
Supplement: Supplementary file 1 [file b7acf2811222736ea4aa8264.docx]

Table 1. Antibodies Used in Study

| Target | Species | Company & Cat# | Dilution |
| --- | --- | --- | --- |
| E-Cadherin | Rat | Invitrogen #13-1900 | 1:200 IF |
| Krt8 | Guinea pig | Fitzgerald #20R-CP004 | 1:200 IF |
| Krt5 | Chicken | BioLegend #905901 | 1:300 IF |
| cl-caspase 3 | Rabbit | Cell signalling #9661 | 1:100 IF |
| LAMP-1 | Mouse | Abcam #ab24170 | 1:100 IF |
| CD68 | Mouse | Invitrogen #MAF-13324 | 1:200 IF |
| PanKLa | Rabbit | PTM Bio # PTM-1401RM | 1:100 IF; 1:500 WB |
| Histone-H3 | Rabbit | Abcam #ab1791 | 1:10 000 |
| Tacstd2 | Goat | R&D Systems BAF1122 | 1:100 IF |
