# Supplementary material for: Apoptotic Cell Clearance Triggers Epithelial Fate Reprogramming During Prostate Regression
Source: Research Square preprint supplement (doi:10.21203/rs.3.rs-7420086/v1), 2025-10-01

Supplementary Figure 4A

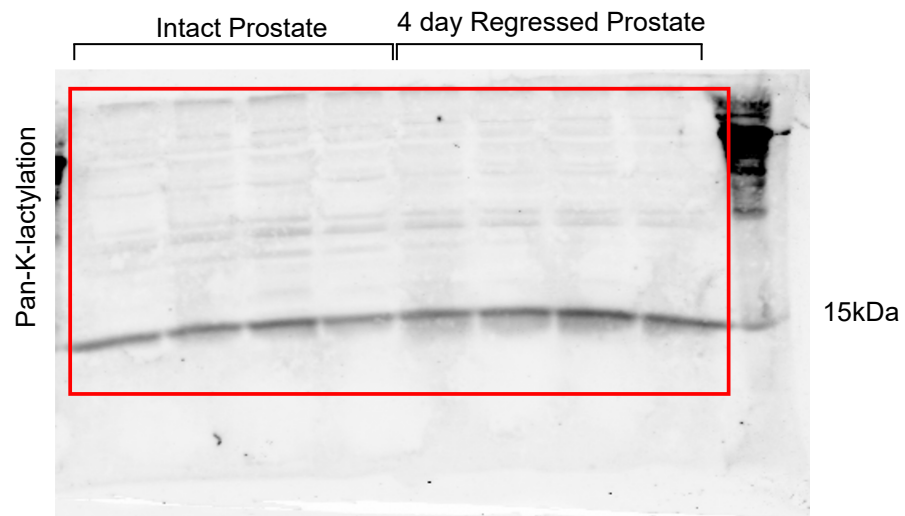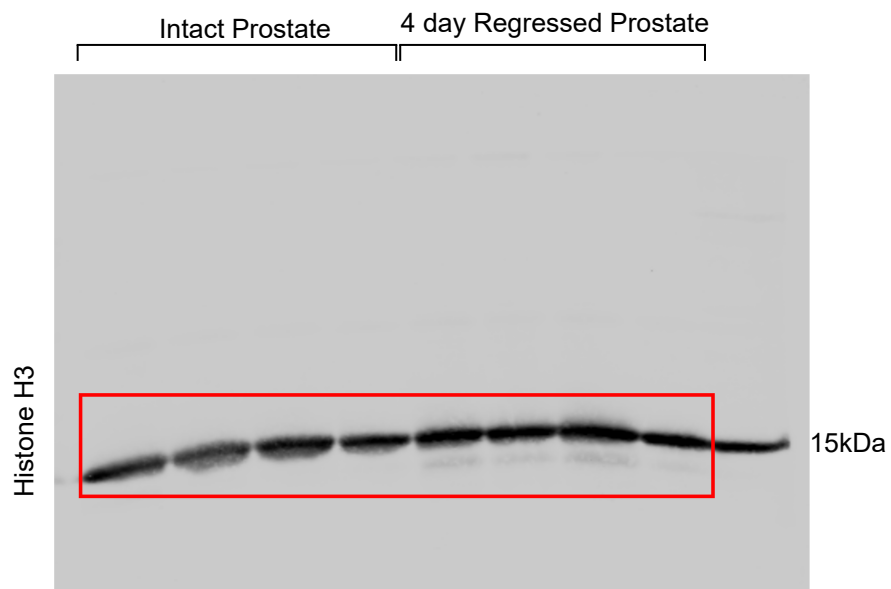

Supplement: Supplementary file [file ee153236b7a298f20ab499e5.pdf]
